# Supplementary material
Source: publisher figshare collection journal article supplement (https://wiley.figshare.com/articles/dataset/_/3564414)
Supplement: Supplementary file 1 [file 1]

### Appendix C

TABLE C1. Spatial capture-recapture model estimates for the total number (N) and density of mountain lions in the 5912 km<sup>2</sup> statespace in western Montana from all 16 candidate models. Models with Sex include individual sex as a covariate on baseline detection probability. Models with  $\sigma_{\text{sex}}$  allow for the scale of activity ranges to vary by sex. Models with Effort incorporate search effort as a covariate for detection probability. Models with RSF incorporate RSF as a covariate on the density of activity centers across the statespace. The 95% CI represent Bayesian credible intervals. We also report the goodness of fit (GOF) p-value for the encounter model. P-values between 0.05 and 0.95 indicate an adequate fit.  $\mathbb{E}(n_{\text{cap}})$  gives the 95% credible interval of the expected number of captured individuals given the estimated point process and encounter process.  $\beta_{\text{sex}}$ ,  $\sigma_{\text{sex}}$ ,  $\beta_{\text{effort}}$ , and  $\beta_{\text{RSF}}$  indicate the significance and direction of the estimated parameters. NS indicates that the 95% CI for the parameter includes zero, + indicates a positive effect on detectability or density, while – indicates a negative effect on detectability or density.

|                                | N   | Median<br>density | 95% CI     | GOF<br>p-value | $\mathbb{E}(n_{\text{cap}})$ | $\beta_{\text{sex}}$ | $\sigma_{\text{sex}}$ | $\beta_{\text{effort}}$ | $\beta_{\text{RSF}}$ |
|--------------------------------|-----|-------------------|------------|----------------|------------------------------|----------------------|-----------------------|-------------------------|----------------------|
| Distance                       | 283 | 4.8               | 3.2 - 7.5  | 0.59           | 43 - 68                      |                      |                       |                         |                      |
| Sex                            | 299 | 5.1               | 3.3 - 8.6  | 0.65           | 43 - 68                      | NS                   |                       |                         |                      |
| $\sigma_{\text{sex}}$          | 299 | 5.1               | 3.3 - 8.8  | 0.66           | 43 - 68                      |                      | NS                    |                         |                      |
| Sex + $\sigma_{\text{sex}}$    | 313 | 5.3               | 3.5 - 9.7  | 0.75           | 30 - 63                      | -                    | +                     |                         |                      |
| Effort                         | 300 | 5.1               | 3.3 - 7.9  | 0.58           | 58 - 86                      |                      |                       | +                       |                      |
| Effort + Sex                   | 333 | 5.6               | 3.7 - 10.4 | 0.66           | 57 - 87                      | NS                   |                       | +                       |                      |
| Effort + $\sigma_{\text{sex}}$ | 310 | 5.2               | 3.4 - 8.5  | 0.63           | 57 - 86                      |                      | NS                    | +                       |                      |

|                                            |     |     |            |      |         |    |    |   |   |
|--------------------------------------------|-----|-----|------------|------|---------|----|----|---|---|
| Effort + Sex + $\sigma_{\text{sex}}$       | 313 | 5.3 | 3.5 - 9.3  | 0.67 | 35 - 81 | NS | NS | + |   |
| RSF                                        | 191 | 3.2 | 2.2 - 5.1  | 0.67 | 51 - 75 |    |    |   | + |
| Sex + RSF                                  | 222 | 3.8 | 2.4 - 16.4 | 0.76 | 38 - 76 | NS |    |   | + |
| $\sigma_{\text{sex}}$ + RSF                | 210 | 3.6 | 2.4 - 5.9  | 0.76 | 51 - 76 |    | NS |   | + |
| Sex + $\sigma_{\text{sex}}$ + RSF          | 209 | 3.5 | 2.4 - 5.7  | 0.76 | 47 - 73 | NS | NS |   | + |
| Effort + RSF                               | 201 | 3.4 | 2.4 - 5.7  | 0.64 | 56 - 84 |    |    | + | + |
| Effort + RSF + Sex                         | 229 | 3.9 | 2.6 - 7.7  | 0.73 | 55 - 85 | NS |    | + | + |
| Effort + RSF + $\sigma_{\text{sex}}$       | 214 | 3.6 | 2.5 - 5.8  | 0.66 | 56 - 84 |    | NS | + | + |
| Effort + RSF + Sex + $\sigma_{\text{sex}}$ | 226 | 3.8 | 2.6 - 6.5  | 0.73 | 50 - 81 | NS | NS | + | + |

---
